# Supplementary material
Source: PubMed Central journal article supplement (PMC9552609)
Supplement: aem.00761-22-s0001.pdf [file aem.00761-22-s0001.pdf]

1 **Development of bacteriophage cocktail against *Pectobacterium carotovorum***  
2 **subsp. *carotovorum* and its effects on virulence of the resistant bacteria**

3  
4 **Hyeongsoon Kim<sup>1, †</sup>, Minsik Kim<sup>2, †</sup>, Sam-Nyu Jee<sup>3</sup>, Sunggi Heu<sup>4</sup>, and Sangryeol Ryu<sup>1\*</sup>**

5 <sup>1</sup>Department of Food and Animal Biotechnology, Department of Agricultural Biotechnology,  
6 Research Institute of Agriculture and Life Sciences, Seoul National University, Seoul 08826,  
7 Korea

8 <sup>2</sup>Department of Food and Nutrition, BK21 FOUR, College of Human Ecology, Yonsei  
9 University,  
10 Seoul 03722, Korea

11 <sup>3</sup>Highland Agriculture Research Institute, National Institute of Crop Science, Pyeongchang-  
12 gun 25342, Korea

13 <sup>4</sup>Department of Agriculture, Forestry and Bioresources , Seoul National University, Seoul  
14 08826, Korea

15  
16 \* Corresponding author.

17 Mailing address: Department of Food and Animal Biotechnology, Seoul National University,  
18 Seoul 08826, Korea

19 Phone: 82-2-880-4856. Fax: 82-2-873-5095. E-mail: [sangryu@snu.ac.kr](mailto:sangryu@snu.ac.kr)

20 †These authors have contributed equally to this work

21 **Table S1.** Phage receptor analysis of *Pectobacterium* POP phages

| Tn5 mutant strain              | Locus_tag of homologous gene in <i>Pcc21</i> <sup>b</sup> | Related cellular apparatus | Phage <sup>a</sup> |       |       |       |       |       |
|--------------------------------|-----------------------------------------------------------|----------------------------|--------------------|-------|-------|-------|-------|-------|
|                                |                                                           |                            | POP11              | POP12 | POP13 | POP14 | POP15 | POP17 |
| <i>wcaA</i> ::Tn5 <sup>c</sup> | <i>Pcc21_RS06680</i>                                      | Colanic acid               | -                  | -     | -     | -     | +     | +     |
| <i>gmd</i> ::Tn5 <sup>c</sup>  | <i>Pcc21_RS06710</i>                                      | Colanic acid               | -                  | -     | -     | -     | +     | +     |
| <i>cpsG</i> ::Tn5 <sup>c</sup> | <i>Pcc21_RS06735</i>                                      | Colanic acid               | -                  | -     | -     | -     | +     | +     |
| <i>flhA</i> ::Tn5              | <i>Pcc21_RS13355</i>                                      | Flagella                   | +                  | +     | +     | +     | -     | -     |
| <i>flhD</i> ::Tn5              | <i>Pcc21_RS13415</i>                                      | Flagella                   | +                  | +     | +     | +     | -     | -     |

22 <sup>a</sup> +, presence of plaques; -, absence of plaques

23 <sup>b</sup> Homologous genes in *Pcc21* were indicated for reference because the whole genome of *Pcc27* was  
 24 not sequenced yet.

25 <sup>c</sup> (1)

26 **Table S2.** Phage susceptibility test against phage-resistant mutants<sup>a</sup>

| Name of bacterial isolate | POP12 | POP15 | POP17 |
|---------------------------|-------|-------|-------|
| Pcc27                     | +     | +     | +     |
| Pcc <sup>POP12</sup>      | -     | +     | +     |
| Pcc <sup>POP17</sup>      | +     | -     | -     |
| Pcc <sup>R1</sup>         | -     | +     | +     |
| Pcc <sup>R2</sup>         | -     | +     | +     |
| Pcc <sup>R3</sup>         | -     | +     | +     |
| Pcc <sup>R4</sup>         | -     | +     | +     |
| Pcc <sup>R5</sup>         | -     | +     | +     |
| Pcc <sup>R6</sup>         | -     | +     | +     |
| Pcc <sup>R7</sup>         | -     | +     | +     |
| Pcc <sup>R8</sup>         | -     | +     | +     |
| Pcc <sup>R9</sup>         | -     | +     | +     |
| Pcc <sup>R10</sup>        | -     | +     | +     |
| Pcc <sup>R11</sup>        | -     | -     | -     |
| Pcc <sup>R12</sup>        | -     | -     | -     |
| Pcc <sup>R13</sup>        | -     | -     | -     |
| Pcc <sup>R14</sup>        | -     | -     | -     |
| Pcc <sup>R15</sup>        | -     | -     | -     |

27 <sup>a</sup> +, presence of plaques; -, absence of plaques

28 **Table S3.** PCWDEs activity of phage resistant mutants

| Name of bacterial isolate | PCWDE activity (mm) <sup>a</sup> |                         |                          |                          |
|---------------------------|----------------------------------|-------------------------|--------------------------|--------------------------|
|                           | Pel                              | Peh                     | Cel                      | Prt                      |
| Pcc27                     | 20.5 ± 1.05                      | 18.1 ± 0.62             | 14.0 ± 0.40              | 22.8 ± 1.81              |
| Pcc <sup>POP12</sup>      | 17.5 ± 0.33                      | 14.1 ± 0.47             | 12.1 ± 0.19              | 18.5 ± 0.76              |
| Pcc <sup>POP17</sup>      | 20.0 ± 0.66                      | 14.8 ± 0.26             | 13.2 ± 0.28              | 23.8 ± 0.27              |
| Pcc <sup>R1</sup>         | 14.5 ± 1.29 <sup>A</sup>         | 15.2 ± 0.82             | 11.9 ± 0.21              | 16.3 ± 0.45              |
| Pcc <sup>R2</sup>         | 14.5 ± 1.02                      | 16.7 ± 0.15             | 11.9 ± 0.19              | 17.4 ± 1.94              |
| Pcc <sup>R3</sup>         | 12.0 ± 1.21 <sup>C</sup>         | 14.2 ± 0.41             | 9.7 ± 0.13 <sup>C</sup>  | 5.7 ± 0.30 <sup>C</sup>  |
| Pcc <sup>R4</sup>         | 13.2 ± 1.16 <sup>C</sup>         | 14.7 ± 0.18             | 10.7 ± 0.38              | 5.8 ± 0.37 <sup>C</sup>  |
| Pcc <sup>R5</sup>         | 15.4 ± 0.12                      | 16.7 ± 0.30             | 12.1 ± 0.15              | 19.2 ± 1.09              |
| Pcc <sup>R6</sup>         | 14.1 ± 1.31 <sup>B</sup>         | 15.0 ± 1.66             | 10.5 ± 1.14 <sup>B</sup> | 7.4 ± 1.85 <sup>C</sup>  |
| Pcc <sup>R7</sup>         | 12.1 ± 0.60 <sup>C</sup>         | 13.9 ± 0.53             | 10.0 ± 0.18 <sup>B</sup> | 11.8 ± 1.41 <sup>C</sup> |
| Pcc <sup>R8</sup>         | 13.0 ± 1.28 <sup>C</sup>         | 14.7 ± 0.29             | 10.5 ± 0.69 <sup>B</sup> | 9.9 ± 2.20 <sup>C</sup>  |
| Pcc <sup>R9</sup>         | 15.6 ± 0.95                      | 15.8 ± 0.07             | 11.3 ± 0.67              | 15.9 ± 0.83              |
| Pcc <sup>R10</sup>        | 10.7 ± 0.49 <sup>C</sup>         | 12.8 ± 0.7              | 6.6 ± 0.79 <sup>C</sup>  | 5.3 ± 0.25 <sup>C</sup>  |
| Pcc <sup>R11</sup>        | 13.8 ± 1.06 <sup>B</sup>         | 15.0 ± 1.11             | 11.2 ± 0.49              | 14.8 ± 1.96 <sup>B</sup> |
| Pcc <sup>R12</sup>        | 13.7 ± 0.39 <sup>B</sup>         | 15.0 ± 0.65             | 10.9 ± 0.24              | 12.3 ± 0.42 <sup>C</sup> |
| Pcc <sup>R13</sup>        | 14.8 ± 0.82                      | 14.4 ± 0.50             | 11.1 ± 0.2               | 14.1 ± 0.92 <sup>C</sup> |
| Pcc <sup>R14</sup>        | 8.8 ± 1.75 <sup>C</sup>          | 8.7 ± 1.77 <sup>C</sup> | 6.1 ± 0.16 <sup>C</sup>  | 5.7 ± 0.11 <sup>C</sup>  |
| Pcc <sup>R15</sup>        | 14.6 ± 1.17                      | 14.6 ± 0.90             | 11.1 ± 0.70              | 13.9 ± 1.77 <sup>C</sup> |

29 <sup>a</sup>The length of clear haloes from inoculated holes indicated enzyme activities. The data represent the  
30 average values and standard deviations of at least three independent experiments. Statistical analysis  
31 was performed using one-way analysis of variance (ANOVA) followed by Tukey post-tests. The  
32 significance of difference among Pcc<sup>POP12</sup> and phage-resistant mutants (Pcc<sup>R1</sup> to Pcc<sup>R15</sup>) was marked  
33 with letters as follows: A,  $P < 0.05$ ; B,  $P < 0.01$ ; C,  $P < 0.001$ .

34

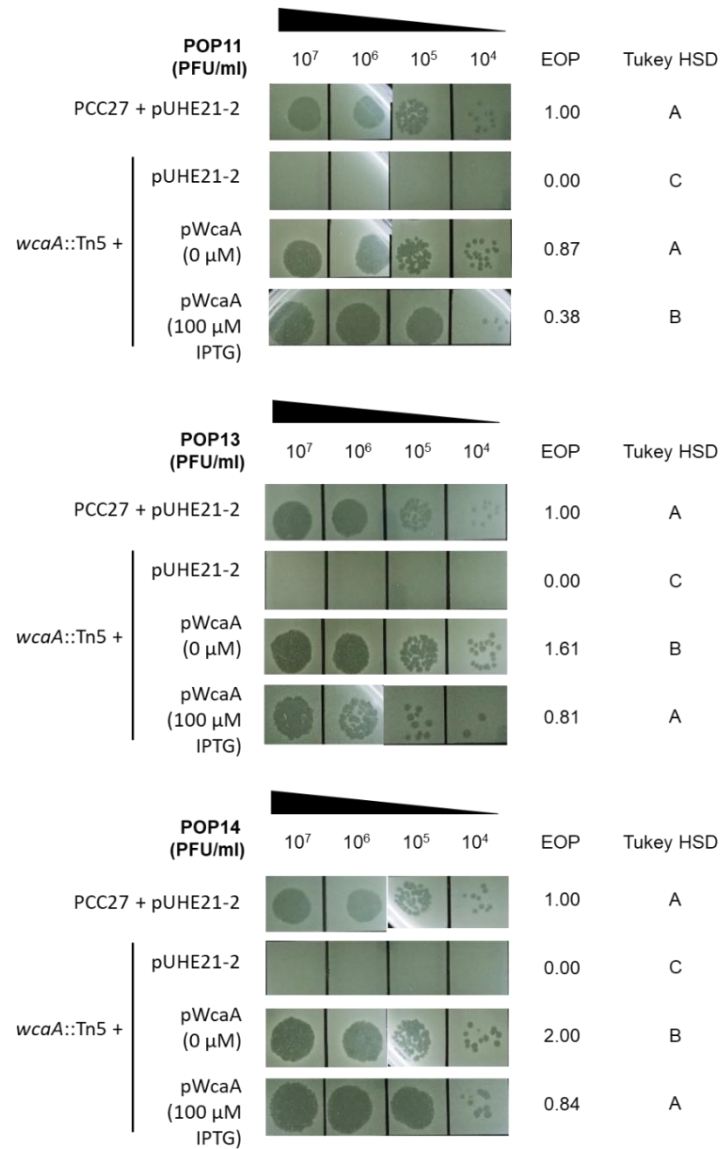

35

36 **Fig S1.** Determination of phage receptor for *Pectobacterium*-targeting phages. Transposon  
 37 mutants with disrupted *wcaA* by Tn5 insertion did not form plaques in the phage spot assay.  
 38 Complementation of *wcaA* gene restored the phage susceptibility. The IPTG concentrations are  
 39 indicated in parentheses. EOP (Efficiency of Plating) was calculated by dividing the titer of the  
 40 phage on each indicated strain by the titer of the same phage on Pcc27 harboring pUHE21-2.  
 41 The significant differences among the experimental groups are marked with letters. One  
 42 representative result of triplicates experiments is shown.

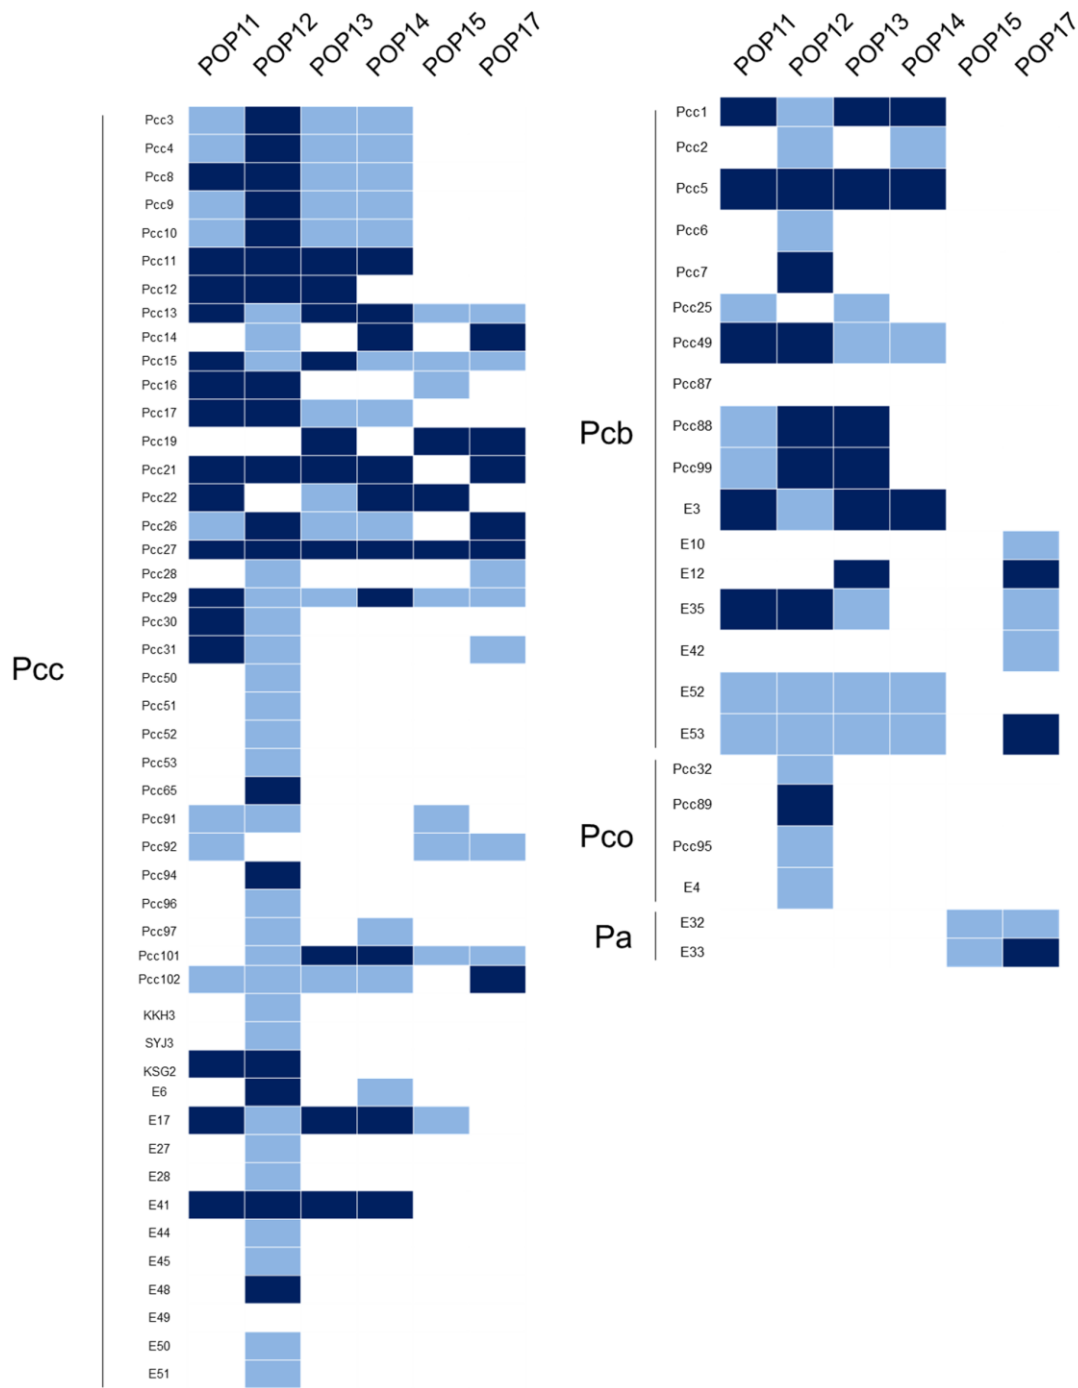

43

44 **Fig S2.** Host ranges of *Pectobacterium* POP phages. The host ranges were determined by spot  
 45 assays. A navy color indicates that a phage could form a single plaque on a bacterial strain. A  
 46 sky blue color indicates an inhibition zone on the bacterial strain.

(A)

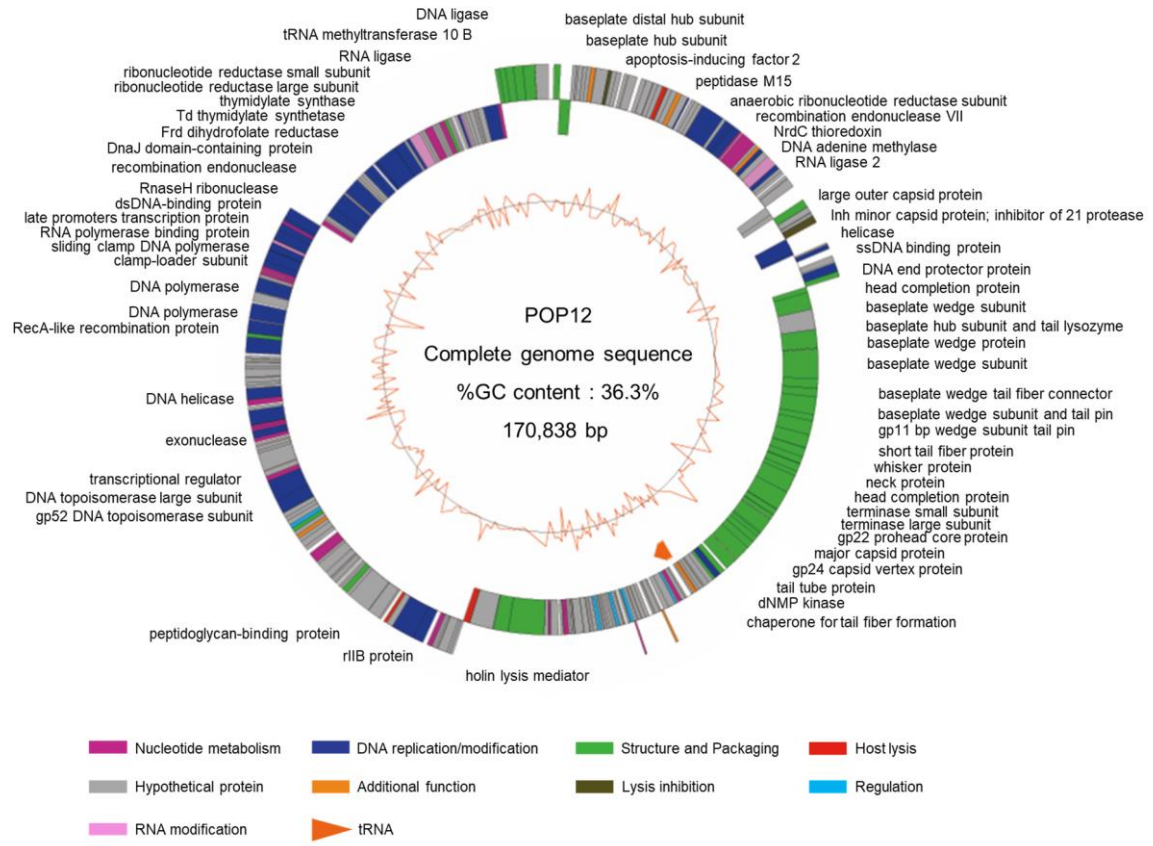

47

(B)

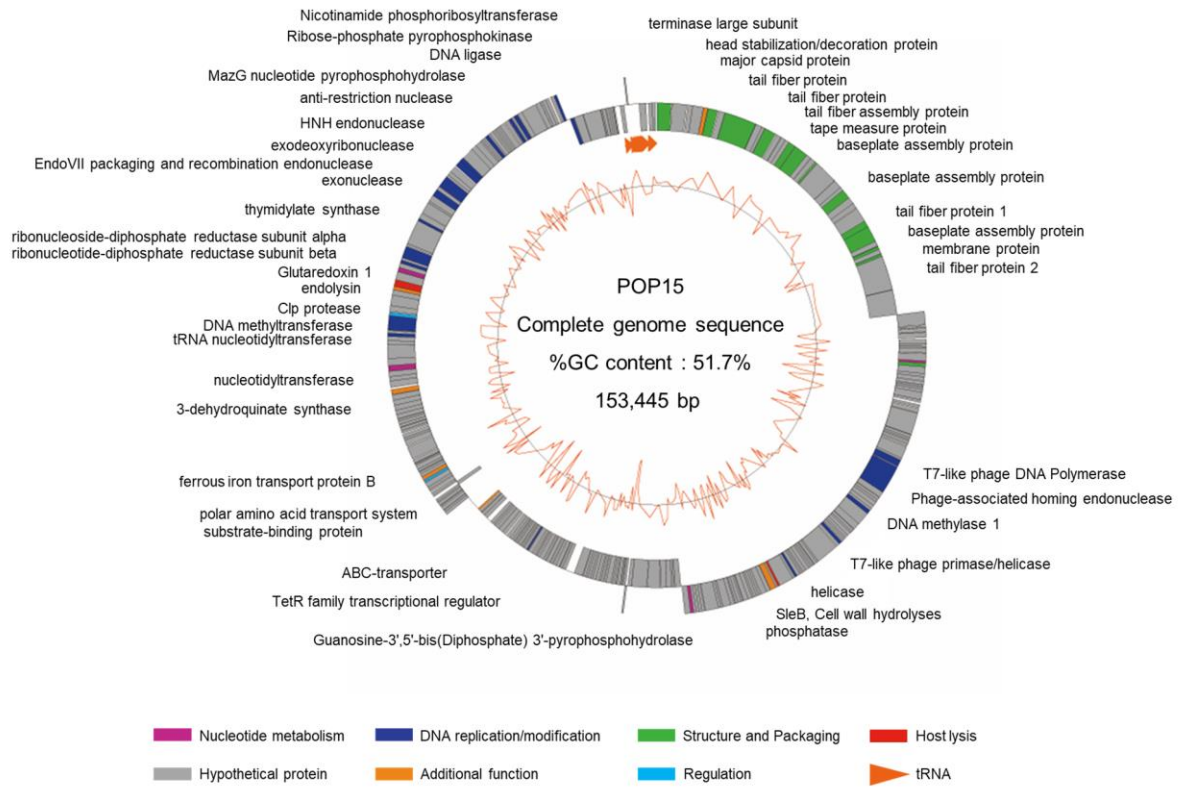

48



(C)

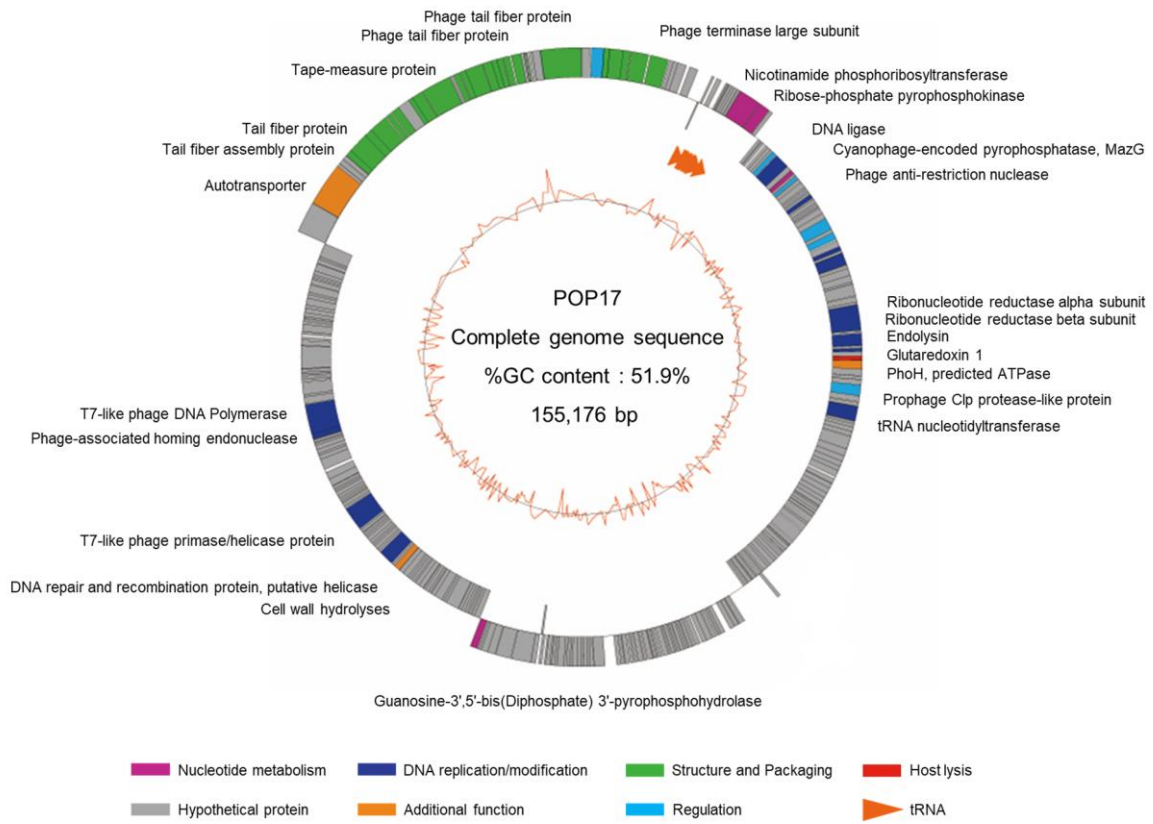

49

50 **Fig S3.** Whole-genome maps of phages (A) POP12, (B) POP15, (C) POP17. The predicted  
51 ORFs with the corresponding gene products are presented in colors based on their functions.  
52 The inner orange line indicates the %GC content of the phage genome.

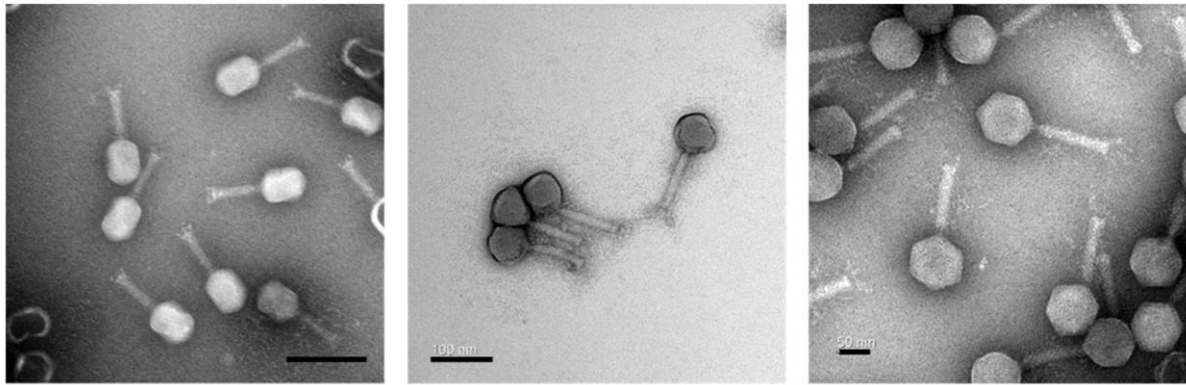

POP12

POP15

POP17

53

54 **Fig S4.** Transmission electron micrographs of three phages. Bars, 200 nm (POP12); 100 nm

55 (POP15); and 50 nm (POP17).

56

57

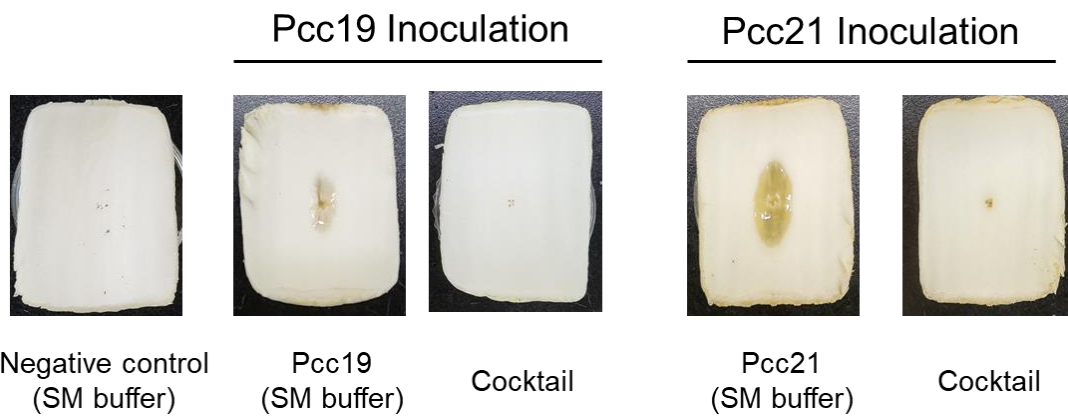

Negative control  
(SM buffer)

Pcc19  
(SM buffer)

Cocktail

Pcc21  
(SM buffer)

Cocktail

58

59 **Figure S5.** The symptoms of soft rot were monitored after 24 h of Pcc19 and Pcc21

60 inoculations. An inoculated sample with SM buffer was used as a negative control. Pcc19 or

61 Pcc21 inoculated samples with SM buffer were used as a non-phage control.

62

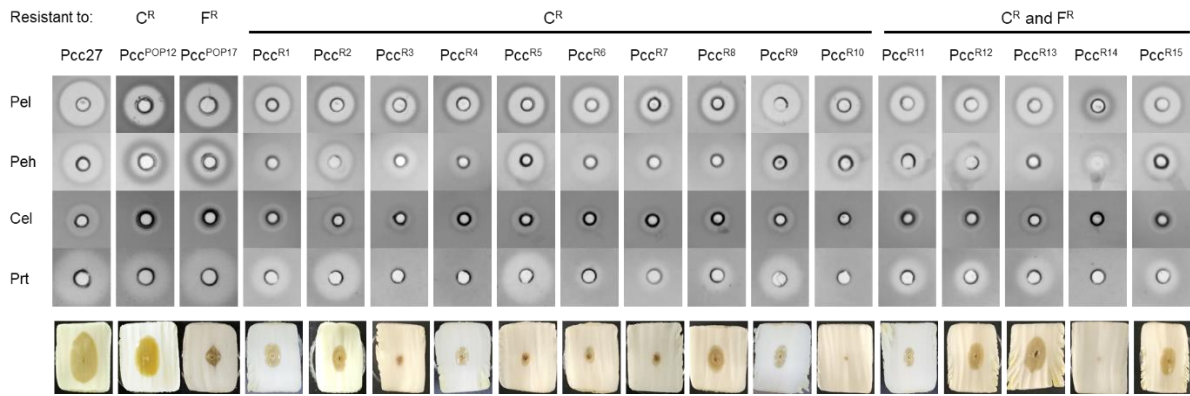

63

64 **Fig S6.** Attenuated virulence of phage-resistant mutants evaluated by extracellular enzyme  
65 assay. The diameter of haloes around the wells was measured to represent the enzyme activities  
66 (details in the *Material and Methods*). Artificially inoculated napa cabbage with Pcc27 and  
67 phage-resistant mutants (Pcc<sup>R1</sup> to Pcc<sup>R15</sup>) were monitored after 36 h of incubation. Pel (pectate  
68 lyase); Peh (polygalacturonase); Cel (cellulase); Prt (protease). One representative result of  
69 triplicated experiments is shown. C<sup>R</sup>, resistant to CA-recognizing phage; F<sup>R</sup>, resistant to  
70 flagella-recognizing phage.

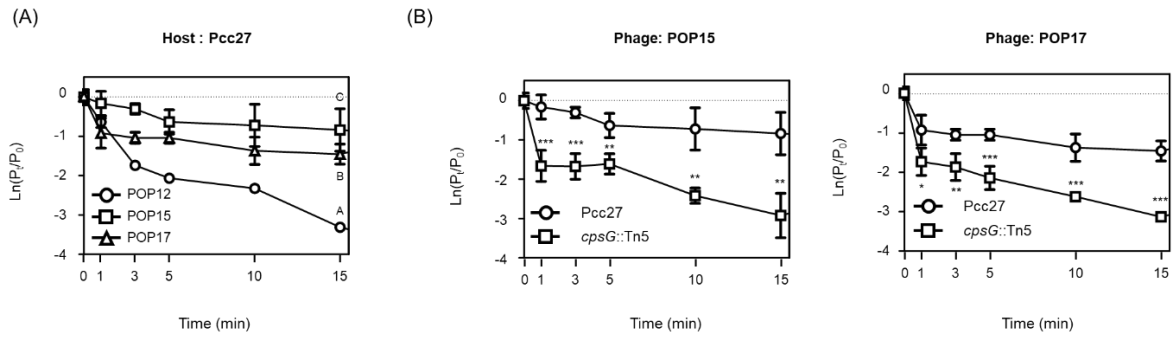

71

72 **Fig S7.** (A) Comparison of the adsorption of three phages (e.g., POP12, POP15, and POP17)  
 73 to the WT Pcc27 strain. Statistical analysis for the last point of each graph was performed by a  
 74 one-way analysis of variance with Tukey's multiple comparison tests. The significant  
 75 differences among the experimental groups are marked with letters. (B) Decreased adsorption  
 76 efficiencies of the flagella-dependent phages (e.g., POP15 and POP17) to the WT Pcc27 strain  
 77 than to the Pcc27 lacking CA. Statistical analysis for each point of graphs was performed by  
 78 unpaired t-tests. Each data point is presented as the natural logarithm of the ratio of end to  
 79 initial phage titer [ $\ln(P_t/P_0)$ ]. The significant differences between the experimental groups are  
 80 marked with asterisks. \*,  $P < 0.05$ ; \*\*,  $P < 0.01$ ; \*\*\*,  $P < 0.001$ .

81 **Reference**

- 82 1. Kim H, Kim M, Bai J, Lim J-A, Heu S, Ryu S. 2019. Colanic Acid Is a Novel Phage  
83 Receptor of *Pectobacterium carotovorum* subsp. *carotovorum* Phage POP72.  
84 *Frontiers in microbiology* 10.
